# Supplementary material for: Infinite chiral single-helical structures formed by the self-assembly of Cu(ii)-N-(2-pyridylmethyl)-aspartate complexes
Source: Royal Society of Chemistry journal article supplement (doi:10.1039/b817157m), 2008-11-14
Supplement: b817157m.pdf [file b817157m.pdf]

Supplementary Information (ESI) for CrystEngComm  
This journal is (c) The Royal Society of Chemistry 2008/10/21

**Supporting Information**  
**For**  
**Infinite Chiral Single-helical Structures Formed by the Self-assembly of**  
**Cu(II)-*N*-(2-pyridylmethyl)-aspartate Complexes.**

**Contents**

General Information

1. Synthesis of *N*-(2-pyridylmethyl)-aspartic acid
2. Synthesis of [Cu(L-pasp)(H<sub>2</sub>O)].4H<sub>2</sub>O and [Cu(D-pasp)(H<sub>2</sub>O)].4H<sub>2</sub>O.
3. Water molecules in the crystal structure of [Cu(L-pasp) (H<sub>2</sub>O)].4H<sub>2</sub>O (Figure S1).
4. The distances between water molecules in the crystal structure of [Cu(L-pasp) (H<sub>2</sub>O)].4H<sub>2</sub>O (Table S1).
5. Selected Bond Lengths and Bond Angles for [Cu(L-pasp) (H<sub>2</sub>O)].4H<sub>2</sub>O (Table S2).
6. Water chains in the crystal structure of [Cu(L-pasp) (H<sub>2</sub>O)].4H<sub>2</sub>O. The top view of the *a* axis. (Figure S2)
7. Water molecules in the crystal structure of [Cu(D-pasp) (H<sub>2</sub>O)].4H<sub>2</sub>O (Figure S3).
8. The distances between water molecules in the crystal structure of [Cu(D-pasp) (H<sub>2</sub>O)].4H<sub>2</sub>O (Table S3).
9. Water chains in the crystal structure of [Cu(D-pasp) (H<sub>2</sub>O)].4H<sub>2</sub>O. (a) The view along the *a* axis. (b) The view along the *b* axis (Figure S4).
10. Selected Bond Lengths and Bond Angles for [Cu(D-pasp) (H<sub>2</sub>O)].4H<sub>2</sub>O (Table S4).
11. Helical structures of the two complexes [Cu(L-pasp)(H<sub>2</sub>O)] and [Cu(D-pasp)(H<sub>2</sub>O)] (Figure S5).

**General Information**

All solvents and reagents were obtained from commercial sources and used as received without further purification. IR data were obtained as KBr pellets on Bomem DA8.3 Fourier-Transform Infrared Spectrometer. Elemental analyses were performed on a HERAEUS CHN-O-RAPID elemental analyzer by Instrumental center, National Chiao Tung University. Ultraviolet-visible spectra were recorded on an Aligent UV-Visible 8453 Spectrophotometer. NMR spectra were obtained on a Bruker DRX-300 NMR spectrometer. Crystal data were collected on a Bruker AXS X8 APEX diffractometer by Instrumental center, National Tsing Hua University.

## 1. Synthesis of *N*-(2-Pyridylmethyl)-aspartic acid (pasp).

To an aqueous solution (10 mL) of aspartic acid (2.66 g, 20 mmol), NaOH (1.6 g, 40 mmol) and 2-pyridinecarboxyaldehyde (2.14 g, 20 mmol) were added. The solution was stirred for 30 min in the ice bath. NaBH<sub>4</sub> (0.74 g, 20 mmol, dissolved in 10 mL of water) was added slowly. The mixture was stirred for one hour and then the pH value was adjusted to the range of 3 – 5 by 1 M HCl. The solution was evaporated and the solid was extracted in hot and dry MeOH (150 mL) for three times. The filtrate was evaporated to obtain white powder.

*N*-(2-Pyridylmethyl)-L-aspartic acid, yield: 54 %; Formula: C<sub>10</sub>H<sub>12</sub>N<sub>2</sub>O<sub>4</sub>, 224.12; ESI-MS *m/z* (rel. intensity): 110(82), 225.2(65, M+H); <sup>1</sup>H NMR (300 MHz, D<sub>2</sub>O): δ 8.43(d, 1H, J<sub>H-H</sub> = 4.7 Hz, py), 7.77(t, 1H, J<sub>H-H</sub> = 7.7 Hz, py), 7.40(d, 1H, J<sub>H-H</sub> = 7.8 Hz, py), 7.33(t, 1H, J<sub>H-H</sub> = 6.3 Hz, py), 4.30(q, 2H, CH<sub>2</sub>), 3.78(q, 1H, CH), 2.72(m, 2H, CH<sub>2</sub>), <sup>13</sup>C NMR (300 MHz, D<sub>2</sub>O): δ 176.90, 173.17, 149.63, 146.26, 141.49, 139.07, 124.94, 59.30, 50.50, 35.45. Elemental Analysis: Calculated, C, 53.58 %; H, 5.35%; N, 12.50%; Found, C, 53.06 %; H, 5.74%; N, 12.16%.

*N*-(2-Pyridylmethyl)-D-aspartic acid, yield: 80 %; Formula: C<sub>10</sub>H<sub>12</sub>N<sub>2</sub>O<sub>4</sub>, 224.12; ESI-MS *m/z* (rel. intensity): 110(82), 225.2(66, M+H); <sup>1</sup>H NMR (300 MHz, D<sub>2</sub>O): δ 8.40(d, 1H, J<sub>H-H</sub> = 4.8 Hz, py), 7.72(t, 1H, J<sub>H-H</sub> = 8.3 Hz, py), 7.36(d, 1H, J<sub>H-H</sub> = 7.8 Hz, py), 7.28(t, 1H, J<sub>H-H</sub> = 6.3 Hz, py), 4.27(q, 2H, CH<sub>2</sub>), 3.74(q, 1H, CH), 2.67(m, 2H, CH<sub>2</sub>), <sup>13</sup>C NMR (300 MHz, D<sub>2</sub>O): δ 177.15, 173.19, 149.64, 145.74, 141.91, 138.97, 124.55, 59.36, 50.45, 35.51. Elemental Analysis: Calculated, C, 53.58 %; H, 5.35%; N, 12.50%; Found, C, 53.10 %; H, 5.86%; N, 12.05%.

## 2. Synthesis of [Cu(L-pasp)(H<sub>2</sub>O)].4H<sub>2</sub>O and [Cu(D-pasp)(H<sub>2</sub>O)].4H<sub>2</sub>O.

To an 10 mL aqueous solution, L-pasp or D-pasp (1 mmol, 0.224 g) and Cu(CH<sub>3</sub>COO)<sub>2</sub> · xH<sub>2</sub>O (0.182 g, 1 mmol) were mixed and left undisturbed to for several days. Blue crystals were collected for further study.

[Cu(L-pasp)(H<sub>2</sub>O)].4H<sub>2</sub>O, Formula: C<sub>10</sub>H<sub>20</sub>CuN<sub>2</sub>O<sub>9</sub>, Molecular weight: 375.82  
Elemental Analysis : Calculated, C, 31.96 %; H, 5.36%; N, 7.45%; Found, C, 31.89 %; H, 5.41%; N, 7.61%; IR (KBr): ν<sub>max</sub>/cm<sup>-1</sup>, 3465 (br, OH), 3194 (w, NH), 1635 (s, C=O), 1393 (s, COO<sup>-</sup>). UV-Vis (Nujol), 686 nm (d-d).

[Cu(D-pasp)(H<sub>2</sub>O)].4H<sub>2</sub>O, Formula: C<sub>10</sub>H<sub>20</sub>CuN<sub>2</sub>O<sub>9</sub>, Molecular weight: 375.82,  
Elemental Analysis: Calculated, C, 31.96 %; H, 5.36%; N, 7.45%; Found, C, 31.86 %; H, 5.21%; N, 7.86%; IR (KBr): ν<sub>max</sub>/cm<sup>-1</sup>, 3446 (br, OH), 3170 (w, NH), 1630 (s, C=O), 1400 (s, COO<sup>-</sup>).UV-Vis (Nujol), 685 nm (d-d).

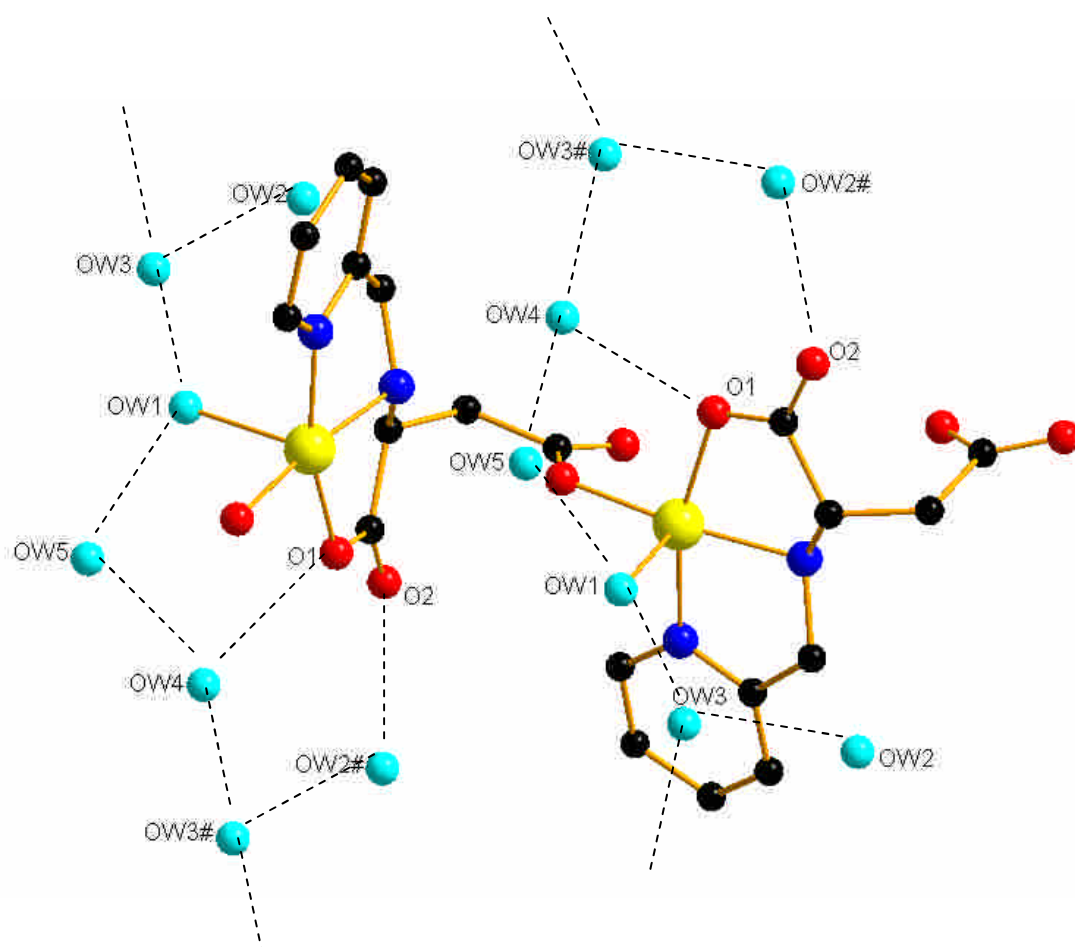

**Figure S1.** Water molecules in the crystal structure of [Cu(L-pasp) (H<sub>2</sub>O)].4H<sub>2</sub>O. C (black), N (dark blue), O (red), Cu (yellow), water (light blue). Symmetry transformations used to generate equivalent atoms: #1 -x+1, y+1/2, -z+1/2; #2 -x+1, y-1/2, -z+1/2.

**Table S1.** The distances between water molecules in the crystal structure of [Cu(L-pasp) (H<sub>2</sub>O)].4H<sub>2</sub>O.

| O...O     | Distance [Å] |
|-----------|--------------|
| OW5...OW4 | 2.733(1)     |
| OW4...OW3 | 2.876(3)     |
| OW3...OW1 | 2.776(4)     |
| OW1...OW5 | 2.785(4)     |
| OW2...OW5 | 2.779(4)     |
| OW2...OW3 | 2.629(1)     |
| OW4...O1  | 2.781(2)     |
| OW2...O2  | 2.781(3)     |

**Table S2.** Selected Bond Lengths and Bond Angles for [Cu(L-pasp)  
(H<sub>2</sub>O)].4H<sub>2</sub>O

| Bond Length [Å] |           | Bond Angle [°]     |            |
|-----------------|-----------|--------------------|------------|
| Cu(1)-O(3)#1    | 1.930(3)  | O(3)#1-Cu(1)-N(2)  | 172.89(16) |
| Cu(1)-O(1)      | 1.994(4)  | O(3)#1-Cu(1)-O(1)  | 94.24(15)  |
| Cu(1)-N(2)      | 1.977(4)  | N(2)-Cu(1)-O(1)    | 82.60(15)  |
| Cu(1)-N(1)      | 2.001(4)  | O(3)#1-Cu(1)-N(1)  | 100.25(16) |
| Cu(1)-OW1       | 2.280(4)  | N(2)-Cu(1)-N(1)    | 82.21(16)  |
| O(1)-C(8)       | 1.272(6)  | N(1)-Cu(1)-O(1)    | 163.92(17) |
| O(2)-C(8)       | 1.232(6)  | O(3)#1-Cu(1)-OW1   | 91.19(16)  |
| O(3)-C(10)      | 1.265(6)  | N(2)-Cu(1)-OW1     | 95.33(16)  |
| O(4)-C(10)      | 1.259(6)  | O(1)-Cu(1)-OW1     | 93.01(17)  |
| N(1)-C(1)       | 1.337(7)  | N(1)-Cu(1)-OW1     | 93.61(16)  |
| N(1)-C(5)       | 1.348(6)  | C(8)-O(1)-Cu(1)    | 113.5(3)   |
| N(2)-C(6)       | 1.476(6)  | C(10)-O(3)-Cu(1)#2 | 114.6(3)   |
| N(2)-C(7)       | 1.478(6)  | C(1)-N(1)-Cu(1)    | 126.2(4)   |
| C(1)-C(2)       | 1.378(9)  | C(5)-N(1)-Cu(1)    | 113.5(3)   |
| C(2)-C(3)       | 1.405(11) | C(6)-N(2)-Cu(1)    | 108.6(3)   |
| C(3)-C(4)       | 1.373(10) | C(7)-N(2)-Cu(1)    | 106.3(3)   |
| C(4)-C(5)       | 1.363(8)  |                    |            |
| C(5)-C(6)       | 1.481(8)  |                    |            |
| C(7)-C(8)       | 1.513(6)  |                    |            |
| C(7)-C(9)       | 1.521(7)  |                    |            |
| C(9)-C(10)      | 1.540(7)  |                    |            |

Symmetry transformations used to generate equivalent atoms:

#1 -x+1, y+1/2, -z+1/2; #2 -x+1, y-1/2, -z+1/2

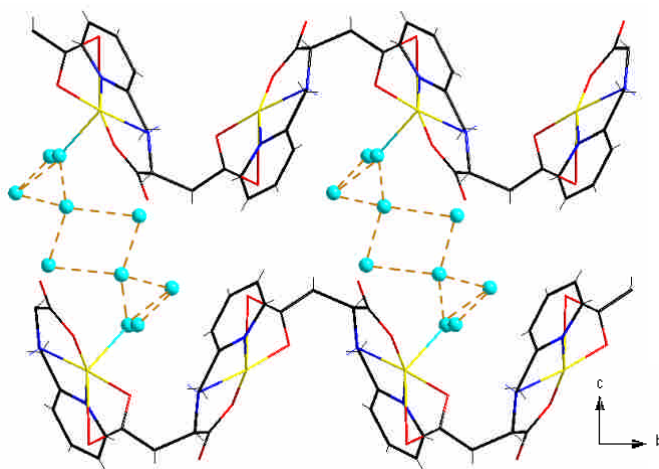

**Figure S2.** Water chains in the crystal structure of [Cu(L-pasp)(H<sub>2</sub>O)].4H<sub>2</sub>O. The top view of the *a* axis. C (black), N (dark blue), O (red), Cu (yellow), water (light blue).

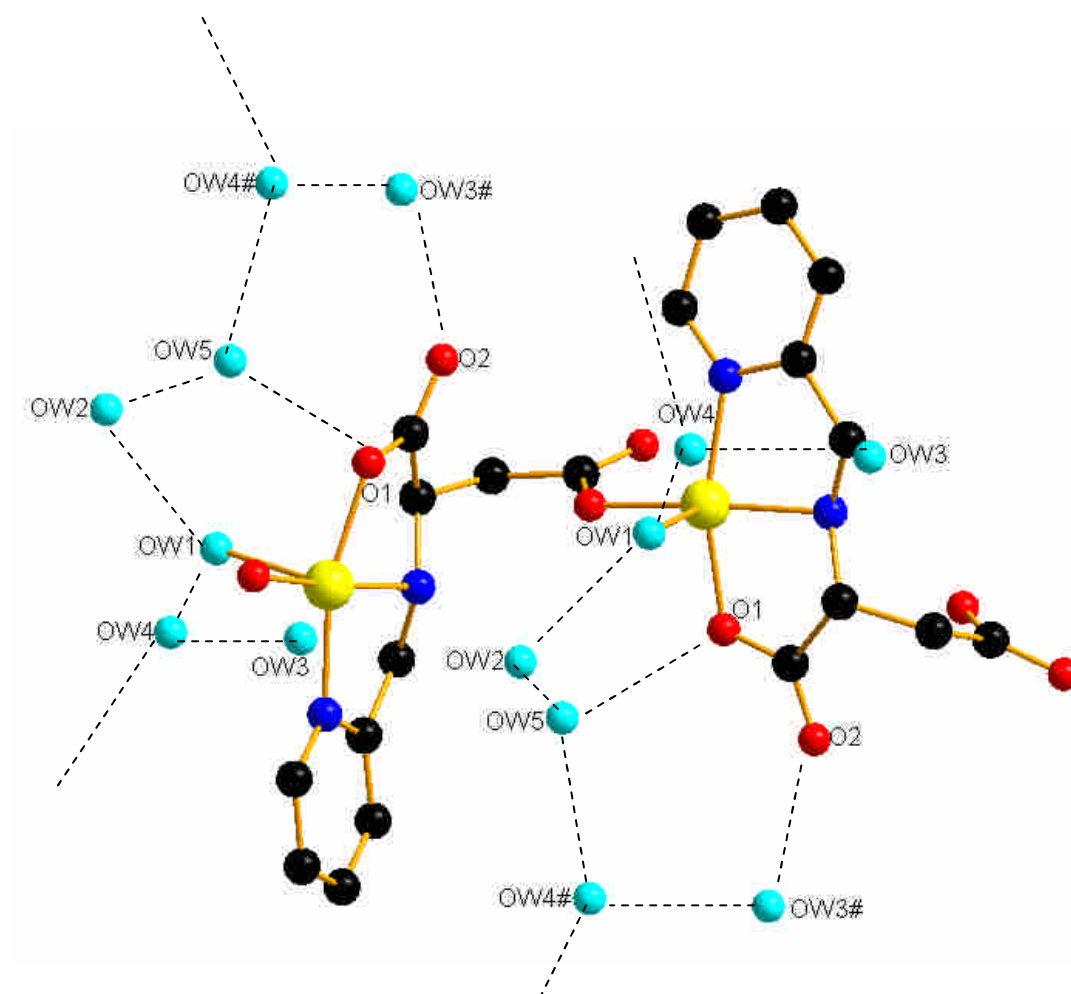

**Figure S3.** Water molecules in the crystal structure of  $[\text{Cu}(\text{D-pasp}) (\text{H}_2\text{O})].4\text{H}_2\text{O}$ . C (black), N (dark blue), O (red), Cu (yellow), water (light blue). Symmetry transformations used to generate equivalent atoms: #1  $x-1/2, -y+3/2, -z+1$ ; #2  $x+1/2, -y+3/2, -z+1$ .

**Table S3.** The distances between water molecules in the crystal structure of  $[\text{Cu}(\text{D-pasp}) (\text{H}_2\text{O})].4\text{H}_2\text{O}$ .

| O...O     | Distance [ $\text{\AA}$ ] |
|-----------|---------------------------|
| OW5...OW4 | 2.788(1)                  |
| OW4...OW3 | 2.854(2)                  |
| OW4...OW1 | 2.723(1)                  |
| OW1...OW2 | 2.796(1)                  |
| OW2...OW5 | 2.787(1)                  |
| O2...OW3  | 2.672(4)                  |
| O1...OW5  | 2.820(1)                  |

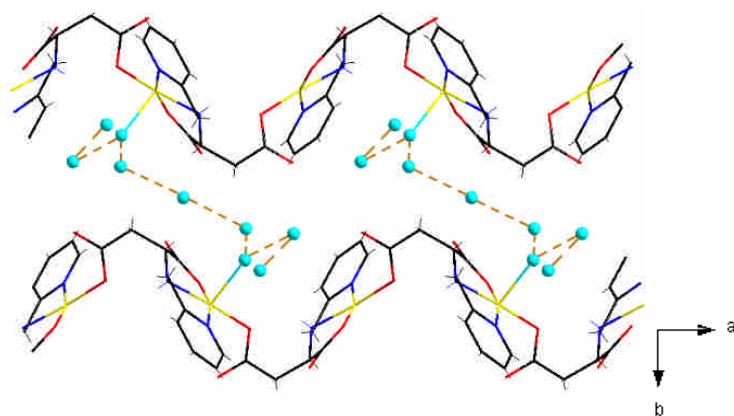

**Figure S4.** Water chains in the crystal structure of  $[\text{Cu}(\text{D-pasp})(\text{H}_2\text{O})]\cdot 4\text{H}_2\text{O}$ . The top view of the *c* axis. C (black), N (dark blue), O (red), Cu (yellow), water (light blue).

**Table S4.** Selected Bond Lengths and Bond Angles for [Cu(D-pasp)  
(H<sub>2</sub>O)].4H<sub>2</sub>O

| Bond Length [Å] |           | Bond Angle [°]     |            |
|-----------------|-----------|--------------------|------------|
| Cu(1)-O(3)#1    | 1.940(3)  | O(3)#1-Cu(1)-N(2)  | 172.54(15) |
| Cu(1)-O(1)      | 1.969(4)  | O(3)#1-Cu(1)-O(1)  | 92.13(14)  |
| Cu(1)-N(2)      | 1.998(4)  | N(2)-Cu(1)-O(1)    | 82.72(15)  |
| Cu(1)-N(1)      | 2.012(4)  | O(3)#1-Cu(1)-N(1)  | 101.99(15) |
| Cu(1)-OW1       | 2.259(3)  | N(2)-Cu(1)-N(1)    | 82.29(16)  |
| O(1)-C(8)       | 1.278(6)  | N(1)-Cu(1)-O(1)    | 163.01(15) |
| O(2)-C(8)       | 1.225(6)  | O(3)#1-Cu(1)-OW1   | 90.75(13)  |
| O(3)-C(10)      | 1.278(5)  | N(2)-Cu(1)-OW1     | 94.93(14)  |
| O(4)-C(10)      | 1.243(5)  | O(1)-Cu(1)-OW1     | 93.50(15)  |
| N(1)-C(1)       | 1.337(7)  | N(1)-Cu(1)-OW1     | 95.71(15)  |
| N(1)-C(5)       | 1.350(6)  | C(8)-O(1)-Cu(1)    | 114.2(3)   |
| N(2)-C(6)       | 1.470(6)  | C(10)-O(3)-Cu(1)#2 | 117.6(3)   |
| N(2)-C(7)       | 1.474(6)  | C(1)-N(1)-Cu(1)    | 128.5(4)   |
| C(1)-C(2)       | 1.379(9)  | C(5)-N(1)-Cu(1)    | 112.8(3)   |
| C(2)-C(3)       | 1.370(10) | C(6)-N(2)-Cu(1)    | 108.2(3)   |
| C(3)-C(4)       | 1.372(10) | C(7)-N(2)-Cu(1)    | 104.9(3)   |
| C(4)-C(5)       | 1.365(7)  |                    |            |
| C(5)-C(6)       | 1.505(7)  |                    |            |
| C(7)-C(8)       | 1.547(7)  |                    |            |
| C(7)-C(9)       | 1.530(6)  |                    |            |
| C(9)-C(10)      | 1.500(6)  |                    |            |

Symmetry transformations used to generate equivalent atoms:

#1  $x-1/2, -y+3/2, -z+1$ ; #2  $x+1/2, -y+3/2, -z+1$

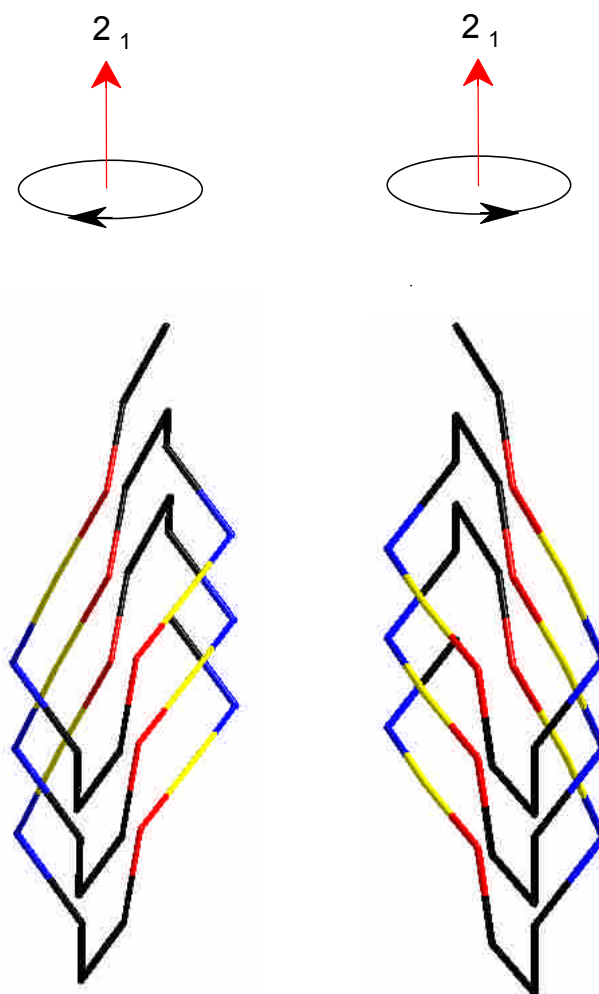

**Figure S5.** Helical structures of the two complexes [Cu(L-pasp)(H<sub>2</sub>O)] (left) and [Cu(D-pasp)(H<sub>2</sub>O)] (right). Only atoms in the helix are shown. C (black), N (dark blue), O (red), Cu (yellow).
